# Supplementary material
Source: publisher site journal article supplement (https://www.spandidos-publications.com/6215/downloadSupplementary)
Supplement: Supplementary file 1 [file downloadSupplementary]

## Sheet: Suppl Table 1
Table SI. Raw glucose and ketone data during 3 years of ketogenic metabolic therapy.
Year	Week	Glucose	Week Avg	Ketones	Week Avg	GKI		Year	Week	Glucose	Week Avg	Ketones	Week Avg	GKI		Year	Week	Glucose	Week Avg	Ketones	Week Avg	GKI
		7.3		0
		5		0.2
		5.4		0.6
1	1	4.8		1.3				2	1	4.9		1.2				3	1	4.4		3.5
		4.1		2
		3.6		3.3						4.7		0.6
		3.8		4.1						4.7		0.6						4.5		2.4
		4.5		3.8						5		1.6
		5.3		2.9						4.8		1.5						4.9		1.9
		4.3	4.81	3.2	2.14	2.24766					4.82		1.1	4.38182					4.6		2.6	1.76923
	2	4.7		2.9					2	4.8		1.5					2
		5.1		2														4.4		1
		5		2.4						4.9		1.3
		5.2		2														4.2		2
		4.9		3.5														4.3		3
		5.1		2.8						5		0.5
		4.6	4.94286	2.14	2.53429	1.95039				5.2	4.975	0.4	0.925	5.37838					4.3		2	2.15
	3	5.3		2.8					3	5.1		0.6					3	5.1		2.3
		4.8		3						4.9		0.6						4.7		1.5
		4.7		3						4.7		2.3						4.1		2.7
										5.1		1.1
		5.1		3						4.6		1.3
										4.5		2.2
		4.6	4.9	2.14	2.788	1.75753				4.6	4.78571	3.4	1.64286	2.91304				4.2	4.525	2.6	2.275	1.98901
	4	4.5		4.3					4	4.7		0.8					4	4.4		3
		4.3		4						4.9		0.5						5.4
		4.6		4.3						5.3		1.5
		4.4		5.2						5.1		1.2
		4		5.3						5.4		1.8
		3.1		5.1						4.6		1.4						5.4		0.7
		4.8	4.24286	5.6	4.82857	0.878698				4.2	4.88571	3	1.45714	3.35294				4.7	4.975	2.8	2.16667	2.29615
	5	5.3		3.9					5	4.9		0.7					5	4.8		1.7
		5.3		4.5														4.6		2.6
		4.8		4						4.4		3.9						4.9		1.4
		5.6		3.4						4.5		2.5
		4.9		3.7						5.1		2.7
		5.2		3.2						4.8		2.1
		4.9	5.14286	3.7	3.77143	1.36364					4.74		2.38	1.9916					4.76667		1.9	2.50877
	6	4.8		2.7					6								6	5		0.6
		5		3.1						5.2		1.8						5.2		1.8
		5.1		3						4.3		4.4						4.4		2.1
		5.6		4.2						4.8		1.7						4.7		1.5
		4.4		4.8						4.5		2.3						5.6		1
		4.9		4.3														5		1
		4.8	4.94286	4.1	3.74286	1.32061					4.7		2.55	1.84314				6.1	5.14286	1.1	1.3	3.95604
	7	5.1		3.9					7	4.6		4					7	4.8		1.2
		5		4.7														4.5		3.3
		5.1		3.2														5.1		1.8
		5.3		4.6														4.9		4.2
		5.3		2.7						5.3		1.5						4.4		3
		4.9		3.3						4.2		2.8						4.4		2.8
		5.1	5.11429	2.6	3.57143	1.432				4.9	4.75	1	2.325	2.04301				3.2	4.47143	4.9	3.02857	1.47642
	8	4.9		3.8					8	4.7		1.9					8	4.5		1.9
		5		3.7														4.7		1.8
		4.6		3.4						3.9		2.2						4.5		3.3
		4.5		5.2						4.7		3.6						4.9		2.4
		3.9		4.5						4.5		3.6
		4.1		5.6
			4.5		4.36667	1.03053					4.45		2.825	1.57522					4.65		2.35	1.97872
	9	4.3		4.7					9								9	5.4		1.3
		4.1		5.3						4.7		3.2						4.9		2
		4.4		3.7
		4.5		5.1						4.9		1.9						4.3		4.3
		4.7		3.6														4.5		4
		4.4		3.6
		4.7	4.44286	4.4	4.34286	1.02303				4.6	4.73333	3.6	2.9	1.63218					4.775		2.9	1.64655
	10	4.4		3.9					10	4.9		1.9					10	5.2		0.9
		4.7		3.8														4.4		2.4
										4.6		1
		4.6		3.9														4.7		2.2
		3.6		5.7						4.6		2.1						5.2		0.7
		3.6		7.3						4.8		1.3						5.4		1.5
		3.2	4.01667	6.8	5.23333	0.767516					4.725		1.575	3				4.7	4.93333	1.6	1.55	3.1828
C1	11	3.4		8					11	4.6		2.5					11	5.3		0.7
		3.1		7.2						5.1		1.5
		4.1		7.6						4.5		4.2						5.2		1.7
		4.3		8						5		2.1						4.6		2.5
		4.1		7.7						4.3		3.7	4.4		4.5
		3.7		6.9						4.4		4.5						4.2		2.1
		3.8	3.78571	5.6	7.28571	0.519608				4.6	4.64286	2.7	3.02857	1.53302				5.3	4.92	1.7	1.74	2.82759
	12	4.1		5.4					12	4.6		1.6					12	4.3		2.6
		3.8		3.2						4.2		1.5						4.8		1.8
		5.2		3.8						4.8		1.7
		4.9		3.1														4.5		2
		5.1		2.6
		4.2		4.4														5.4		2.1
		4.2	4.5	4.6	3.87143	1.16236				4.9	4.625	1.1	1.475	3.13559				4.8	4.76	0.9	1.88	2.53191
	13	4.2		3.6					13	5.3		2.3					13	4.8		1.2
		4.4		2.6														5.4		0.9
		4.1		3.6						4.4		1.8						5.1		1.7
		4.9		4.5						4.6		1.2						4.8		1.6
		3.7		6.3						4.4		1.3
		4.4		3.6														5.5		0.9
		5.2	4.41429	2.2	3.77143	1.17045				5	4.74	0.7	1.46	3.24658				4.7	5.05	0.8	1.18333	4.26761
	14	4.7		3.4					14	5.6		1.1					14
		4.4		4.2						4.4		3						5.1		1
		4.2		3.5						4.3		3.7						4.8		1.6
		4.3		5						4.2		2.1						4.7		2.1
		4.2		4.6						4.2		3.7						5		2.1
		3.4		6.6						4.3		4.9						5.3		1.2
		3.6	4.11429	7.1	4.91429	0.837209				3.8	4.4	4	3.21429	1.36889				4.9	4.96667	1.1	1.51667	3.27473
C2	15	3.2		6.7					15	4.3		2					15
		3.7		7.5						4.2		2.7						5.4		1.6
		4.7		5.4						4.7		4.7						5.1		2.4
		4.4		5.2						4.2		6.7						5.4		0.6
		4.3		5.5						4.3		3.9						5.1		1.5
		4.6		5.6						4.6		1.4						5.3		1.6
		4	4.12857	5.1	5.85714	0.704878				4.8	4.44286	3.7	3.58571	1.23904				5.1	5.23333	0.8	1.41667	3.69412
	16	3.6		5.6					16	4.8		2.4					16	4.9		1.1
		4.5		5.2						3.9		4						4.8		1.8
		4.9		4.2						5.1		1.8						4.7		0.7
		4.6		4.5						5		1.7						5.4		1.6
		4.5		2.3														5.2		1.2
		4.6		2.2														5.1		0.8
		4.7	4.48571	2.6	3.8	1.18045				4.8	4.72	1.7	2.32	2.03448				5.6	5.1	0.6	1.11429	4.57692
	17	4.6		2.2					17	4.8		3.6					17	5.6		0.6
		4.4		2						5.2		0.7						5.7		0.6
		4.6		2.1						4.6		2.9
		5.3		3
		4.8		1.7
		4.1		3.1
		5.5	4.75714	1.8	2.27143	2.09434					4.86667		2.4	2.02778				5.3	5.53333	2.2	1.13333	4.88235
	18	4.7		1.9					18	4.4		1.6					18	5.3		1.4
		4.4		2.1														6.1		0.5
		4.6		1.8
		5.2		3.2														5.1		1
		5.6		2.1						4.2		3.2						5.2		0.7
		4.5		2.9						4.6		1.9						5.7		0.8
		4.9	4.84286	2.7	2.38571	2.02994					4.4		2.23333	1.97015				6.2	5.6	0.6	0.833333	6.72
C3	19	4.2		2.9					19	4.6		1.7					19	5.2		0.8
		4.3		3.8
		4.2		4.4						4.6		2.5						5.2		1.7
		4.7		2.8						4.7		3.2
		4.3		2.5														5.2		1
		4.3		2.9														4.9		0.6
		4.3	4.32857	3.5	3.25714	1.32895					4.63333		2.46667	1.87838					5.125		1.025	5
	20	4.6		1.2					20	4.4		2.6					20	5.4		1.1
		4.7		1.7														5.1		0.7
		4.6		2.3						4.7		2.8						5.5		1.4
		4.6		2.5														4.9		1.2
		5.3		2.1														4.9		2.4
		5.1		1.4						4.5		2.7						4.8		3.2
		4.6	4.78571	2.7	1.98571	2.41007					4.53333		2.7	1.67901				4.7	5.04286	1.3	1.61429	3.12389
	21	4.8		1.6					21	4.8		3.5					21	4.4		2.7
		4.2		3														4.4		3.9
		4.1		3.2						4.1		1.5						3.5		4.6
		4.2		2.9														4.6		4.4
		4.2		3.5						4.8		1						4.3		5.3
		4.5		2.9						4.5		1.3						2.8		2.8
		4.9	4.41429	1.9	2.71429	1.62632					4.55		1.825	2.49315				5.1	4.15714	1.9	3.65714	1.13672
	22	4.4		5.6					22	5		0.9					22	4.9		1
		4.1		5						4.6		2						4.6		2.7
		3.6		5.2						4.8		0.5						5		2.6
		3.8		6.2						4.8		0.5						5.3		2.1
		2.8		5.2						5.2		1.2						4.7		3.9
		4.2		5.3						5		1.5						4.7		3.3
		3.9	3.82857	6	5.5	0.696104				4.4	4.82857	2	1.22857	3.93023				4.6	4.82857	3.5	2.72857	1.76963
	23	4.2		4.8					23								23
		5.5		2.4														7.6		1.3
		5.1		2.8
		4.4		3.1						5.5		2.2
		4.7		1.5														4.6		1.7
		4.9		1.7
		4.2	4.71429	2	2.61429	1.80328				5	5.25	2	2.1	2.5					6.1		1.5	4.06667
	24	4.9		1.6					24	5.3		1					24	5.2		3.2
		5.1		1.3
		4.7		1.9						5.2		1.9						6.4		1.6
		5.3		1.1						4.7		2						5.5		1.9
		5		2						5.2		1.1						5.8		1.7
		4.6		2.3														5.8		1.2
		5.1	4.95714	2.8	1.85714	2.66923				4.8	5.04	1.3	1.46	3.45205				5.1	5.63333	1.3	1.81667	3.10092
	25	5.2		2.6					25	4.7		2.1					25	4.9		1.3
		4.9		2.8
		5.3		1.8						4.6		2.4						4.1		2.2
		5.3		3						4.3		2.1						4.8		3.1
		5.4		2.7														5.2		2.8
		4.6		2.5						4.6		1.6						4.8		1.5
		4.9	5.08571	2.3	2.52857	2.0113				4.9	4.62	1.7	1.98	2.33333				4.9	4.78333	1.2	2.01667	2.3719
	26	5		1.9					26								26	5.2		1.3
		4.8		1.6						5.3		1.5						4.9		1.3
		5.5		1.3														4.6		2.5
		4.8		1.2						4.7		1.2						5		0.7
		5.2		0.8						5.1		2.2						4.4		3.1
		4.9		1.9						4.3		4.3						4.8		1.5
		4.8	5	1.6	1.47143	3.39806				4.4	4.76	3.1	2.46	1.93496				5.1	4.85714	1.6	1.71429	2.83333
	27	4.9		3.2					27								27	4.7		0.9
		5.1		1.8						4.2		2.9						4.8		1.5
		5.1		1						4.7		1.7
		5.3		1.5						5.3		2.1
		4.9		3.4						4.3		2.5
		4.8		1.4
		4.5	4.94286	2	2.04286	2.41958				4.8	4.66	1.4	2.12	2.19811					4.75		1.2	3.95833
	28	5.3		1.7					28								28
		5		1.1						4.4		2.5
		5.9		1.2														4.7		2.3
		5.4		0.3						5		1.9						4.8		1.8
		4.5		0.3						4.9		1.1
		5.4		1						5.2		1.9						4.9		2
		4.9	5.2	0.5	0.871429	5.96721				5.1	4.92	3.1	2.1	2.34286				5.4	4.95	1.2	1.825	2.71233
	29	4.7		1.8					29	4.5		1.8					29	4.5		1.7
		5.1		2.4						4.6		1.9						5.2		0.7
		4.4		1.5														5.1		0.8
		5.1		0.8						4.8		1.9						5.4		2.3
		4.4		3.9						4.3		4.2						4.7		1.8
		4.9		1.1						4.4		3.8
		4.6	4.74286	0.7	1.74286	2.72131				5.1	4.61667	1.7	2.55	1.81046				5.2	5.01667	0.8	1.35	3.71605
	30	5.3		0.4					30	4.8		3.3					30	5.8		0.9
		5		1.8						4.5		4.5						4.7		1.3
		5		0.8						4.8		2						5.1		1.5
		4.4		1.2						5.2		2.3						4.8		3.3
		4.3		3.1														5.1		2
		4.3		3.2														5.3		0.7
		5.3	4.8	1.7	1.74286	2.7541				4.4	4.74	4.7	3.36	1.41071				5.2	5.14286	2.6	1.75714	2.92683
	31	4.6		1					31	4.4		2.7					31
		4.9		2.9						5.2		2.4
		4.4		1.1						4.8		2						6.1		1.4
		5.2		0.2														7.5		1.7
		5.3		0.7														8		0.8
		4.9		1.7														9		1.2
		5	4.9	1.1	1.24286	3.94253					4.8		2.36667	2.02817					7.65		1.275	6
	32	4.6		1.3					32	5.1		1.4					32
		5		2.3						4.6		5.6						8.9		0.1
		5.2		1.2						4.8		2.8						8.7		0.4
		4.3		1.8						4.3		2.8						6.3		0.4
		6		1.5														5.3		0.4
		5.3		1.3						4.4		3.9						5.2		0.7
		5.1	5.07143	1.3	1.52857	3.31776				5	4.7	2.3	3.13333	1.5					6.88		0.4	17.2
	33	5		1.1					33	4.8		1.4					33	6.4		0.4
		4.1		3.2						4.7		3.6						5.1		0.9
		4.1		3.9														6		1.5
		3.4		5.4						4.7		3.3						5.2		2
		3		5.9						4.7		1.8						6.4		0.6
		3.7		5.9						4.7		2.2
		4.2	3.92857	3.8	4.17143	0.941781					4.72		2.46	1.9187					5.82		1.08	5.38889
	34	4.2		2.2					34								34	7		2.8
		4.6		3						4.9		2						6.7		1.6
		4.4		4
		4.9		2.3						4.8		2.5						6.8		0.5
		5.1		1.8						4.4		2.1						5.8		1.5
		4.6		3														5.3		1.9
		5.6	4.77143	0.9	2.45714	1.94186				5.1	4.8	2.6	2.3	2.08696				5.1	6.11667	3.1	1.9	3.2193
C4	35	4.7		1.5					35	3.4		1.6					35
		5.6		1.1														5.2		2.6
		4.9		1.6														6.2		1.5
		5.5		1						4.7		2.3						4.9		1.1
		4.4		1.3						4.8		0.9						5.4		2
		4.9		1.2						4.1		1.2						6		0.5
		5.7	5.1	0.9	1.22857	4.15116				4.3	4.26	1.9	1.58	2.6962				8	5.95	0.4	1.35	4.40741
	36	4.9		1.1					36								36	5.8		0.5
		4.6		2.1						4.6		3.2						5.7		0.8
		5.2		1						4.9		1.8						5.4		2.3
		5.1		1														5		1
		5.2		1.2						4.2		1.9						5.1		1.3
		5.2		0.9														5.1		1.7
		4.9	5.01429	0.9	1.17143	4.28049					4.56667		2.3	1.98551				5.2	5.32857	3	1.51429	3.51887
	37	4.9		1.1					37	4.6		4.3					37	6.5		0.8
		4.9		1.8														4.8		2.4
		4.1		2						5		1.5						5.4		3.2
		4.7		3.1						4.2		3.8						4.6		4.3
		4.4		1.5						3.8		2.8						5.9		1
		4.3		4.5						4.6		2.9						6.3		1.7
		4.8	4.58571	1.8	2.25714	2.03165				4.8	4.5	2.1	2.9	1.55172				5.8	5.61429	1.7	2.15714	2.60265
	38	4.5		2.8					38								38	5.6		0.4
		5.4		1.5														5.7		0.8
		4.5		1.5
		4.4		1						4.4		1.8						5.8		0.5
		4.4		3						4.4		2.6
		4.7		1.5						4.6		2.4						5.8		0.7
		4.8	4.67143	1.9	1.88571	2.47727				4.9	4.575	4	2.7	1.69444				5.3	5.64	1.2	0.72	7.83333
C5	39	5		1.5					39	4.7		2.6					39	5.8		1
		4.2		2.2														5.5		0.9
		4.1		2.2						4.7		1.9						5.9		0.6
		3.1		7.4														6.3		1.2
		3.3		6.7						4.8		2						5.4		1.2
		3.6		6.3														5.7		1.5		1.5
		4.7	4	4.6	4.41429	0.906149					4.73333		2.16667	2.18462				4.8	5.62857	0.8	1.02857	5.47222
	40	4.6		3.4					40								40	5.2		1.2
		4.6		3.8						4.4		2.4						5.3		1.1
		4.4		3						5.1		1						6.6		1.4
		5.4		2.7						4.9		1.5
		5.4		1.1						4.4		3.2
		4.7		1.3														4.8		3.5
		4.2	4.75714	2.1	2.48571	1.91379				4.6	4.68	2.4	2.1	2.22857				5.8	5.54	2.5	1.94	2.85567
	41	4.8		2					41								41	5.3		2.7
		4.8		1.9						4.7		1.3						5.7		0.8
		4.5		2.6						4.8		2.7
		4.8		1.5						4.2		2.9						5.6		0.5
		4.7		1.6						4.1		5.5						5.1		1
		5.1		0.6						4.4		2.5						7		3.1
		5.2	4.84286	1.5	1.67143	2.89744					4.44		2.98	1.48993					5.74		1.62	3.54321
	42	4.6		1.6					42	4.7		3.3					42	5.4		0.9
		5.1		0.8
		5		1														5.1		1
		4.3		1.6						4.7		2.1
		5		0.8
		5.2		0.8														5.8		1
		4.8	4.85714	1	1.08571	4.47368					4.7		2.7	1.74074				5	5.325	0.5	0.85	6.26471
C6	43	4.9		2					43	4		2.7					43	5.3		1.1
		4.8		2.3						4.2		6.4						4.6		1
		4.6		2.3						4.6		3.8						5.3		1.6
		4.1		2.3						4.6		1.9						5.4		0.7
		4.8		2						4.1		3.8
		4.9		1.9														5.1		1.9
		5	4.72857	1.4	2.02857	2.33099					4.3		3.72	1.15591				5.2	5.15	1.6	1.31667	3.91139
	44	5.1		1.1					44	4.4		2.6					44	5.4		1
		4.8		0.8														5.2		0.9
		4.9		0.7														5.5		0.4
		4.1		3.1
		3.8		5.6						4.7		1.9						5.2		1.2
		2.6		7						5.2		1.2						5.6		1.2
		2.7	4	7.2	3.64286	1.09804				5.2	4.875	2.2	1.975	2.46835				5.3	5.36667	1.1	0.966667	5.55172
	45	3.8		3.5					45	4.3		3.5					45	6.2		0.3
		4.1		6
		4.5		4.9						4.4		2						5.4		0.6
		4.4		3.6						4.5		2.2
		4.1		4.5
		4.6		3						4.8		1.3
		4.8	4.32857	2.4	3.98571	1.08602					4.5		2.25	2					5.8		0.45	12.8889
	46	4.9		1.5					46	4.4		3					46	5.2		1.6
		4.9		1.6						4.4		3.2						5.2		1.5
		4.3		1.4						5.1		1.8						5		1.9
		4.7		1.6						4.6		2.7						4.2		3.4
		4.4		2.4														5.4		1
		4.7		1.4						5.1		0.5						5.3		1
		4.9	4.68571	1.4	1.61429	2.90265				5.5	4.85	1.3	2.08333	2.328				4.8	5.01429	1.7	1.72857	2.90083
	47								47	4.5		2					47	4.9		1.8
										4.3		1.8						5.3		2.2
										5.2		1.4						5.1		3.3
		5.2		2.4						4.6		1.8						5.9		0.8
										4.1		3						5.4		0.6
		5.5		1.5						4.5		4.3						5.6		0.4
			5.35		1.95	2.74359				4.4	4.51429	2.8	2.44286	1.84795				4.8	5.28571	0.8	1.41429	3.73737
	48	5		2.7					48	4.2		3.2					48	4.5		1.8
										4.7		2.1						4.8		2.3
																		5.1		2.2
																		4.8		1.7
										4.4		2.4						4.8		1.1
																		4.6		1.4
		4.5	4.75	2	2.35	2.02128				4.3	4.4	1.8	2.375	1.85263				5.1	4.81429	3.7	2.02857	2.37324
	49								49								49	5.3		1.3
										5.1		1.6						5.1		1.6
		4.5		1.9
										4.6		2.6
										5.1		2.3
			4.5		1.9	2.36842					4.93333		2.16667	2.27692					5.2		1.45	3.58621
	50	4.6		2.3					50	4.1		4.9					50
		4.6		1.2						4.9		0.9
										4.3		3
										4.7		1.2
										4.8		2.5
										4.4		3.1
		4.3	4.5	2.5	2	2.25				4.8	4.57143	0.7	2.32857	1.96319
	51								51								51
										4.3		2.5
		5.2		0.8
		4.8		1.1
		4.5	4.83333	1.4	1.1	4.39394				4.5	4.4	1.5	2	2.2
	52	4.9		1					52	5.2		0.9					52
										4.9		1.5
										4.5		3.1
		5		0.5
		5		0.7						5.3		1.7
		4.8		0.9						4.2		1.6
		4.9	4.92	1.4	0.9	5.46667				5	4.85	2	1.8	2.69444
Year Avg			4.65346		2.82455	1.64751					4.67737		2.32029	2.01586					5.23579		1.63842	3.19564
St Dev			0.378479		1.43428						0.194727		0.668024						0.621635		0.648692
Min Value			3.78571		0.871429	0.519608					4.26		0.925	1.15591					4.15714		0.4	1.13672
Max Value			5.35		7.28571	5.96721					5.25		4.4	5.37838					7.65		3.65714	17.2
